# Supplementary material for: Charge Carrier Recombination Dynamics in MAPb(Br1−yIy)3 Single Crystals
Source: MDPI journal article supplement (doi:10.3390/cryst12101425), 2022-10-09
Supplement: s1 [file s1]

Supporting Information

# Charge Carrier Recombination Dynamics in MAPb(Br<sub>1-y</sub>I<sub>y</sub>)<sub>3</sub> Single Crystals

Zijie Xiao <sup>1,†</sup>, Tingting Tao <sup>2,†</sup>, Jingting Shu <sup>2</sup>, Wei Dang <sup>2,\*</sup>, Shusheng Pan <sup>1,3</sup> and Wei Zhang <sup>1,3,4,\*</sup>

<sup>1</sup> School of Physics and Materials Science, Guangzhou University, Guangzhou 510006, China

<sup>2</sup> Hebei Key Lab of Optic-electronic Information and Materials, College of Physics Science and Technology, Hebei University, Baoding 071002, China

<sup>3</sup> Research Center for Advanced Information Materials (CAIM), Huangpu Research and Graduate School of Guangzhou University, Guangzhou 510006, China

<sup>4</sup> Guangzhou University-Linköping University Research Center on Urban Sustainable Development, Guangzhou University, Guangzhou 510006, China

\* Correspondence: Zhang: wzhang@gzhu.edu.cn; Dang: dangwei@hbu.edu.cn.

† These authors contributed equally to this work.

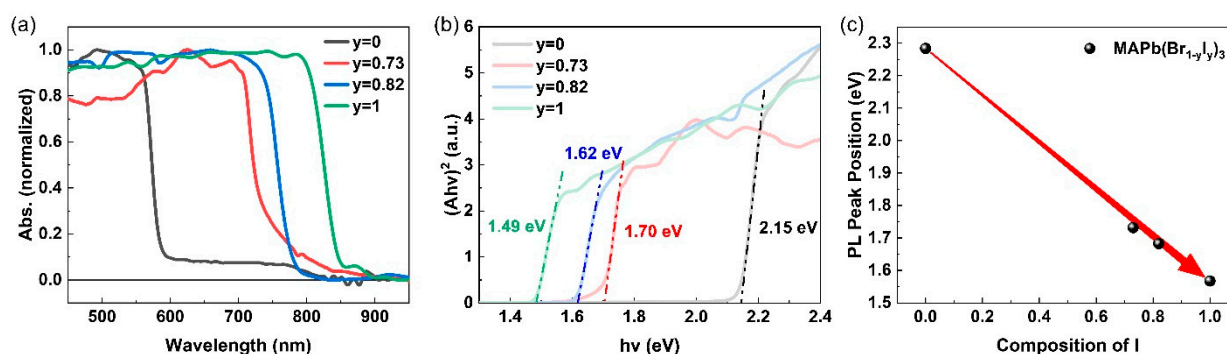

**Figure S1.** (a) Absorption spectra of MAPb(Br<sub>1-y</sub>I<sub>y</sub>)<sub>3</sub> single crystals measured by integration sphere method. (b) Bandgap energy obtained by Tauc analysis. (c) The correlation between PL peak energies and I compositions for MAPb(Br<sub>1-y</sub>I<sub>y</sub>)<sub>3</sub> single crystals.

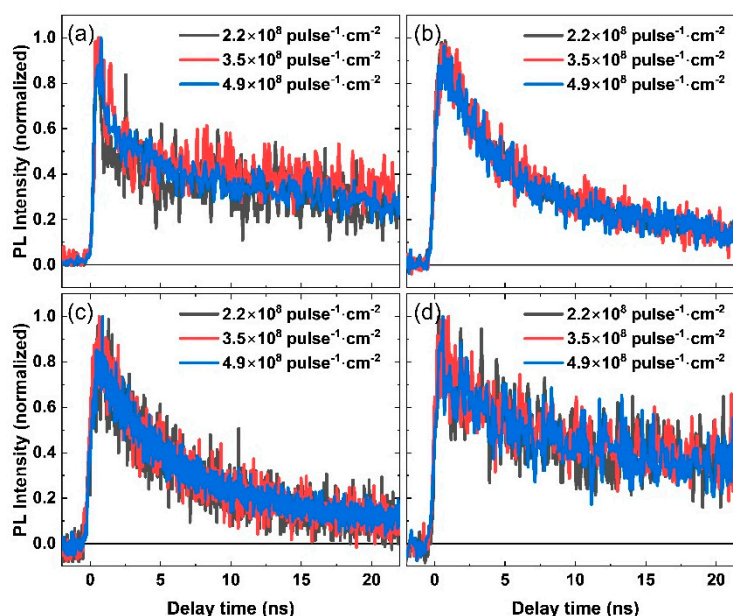

**Figure S2.** TRPL kinetics of MAPb(Br<sub>1-y</sub>I<sub>y</sub>)<sub>3</sub> single crystals with (a)  $y = 0$ ; (b)  $y = 0.73$ ; (c)  $y = 0.82$ ; (d)  $y = 1$  under different excitation fluencies.

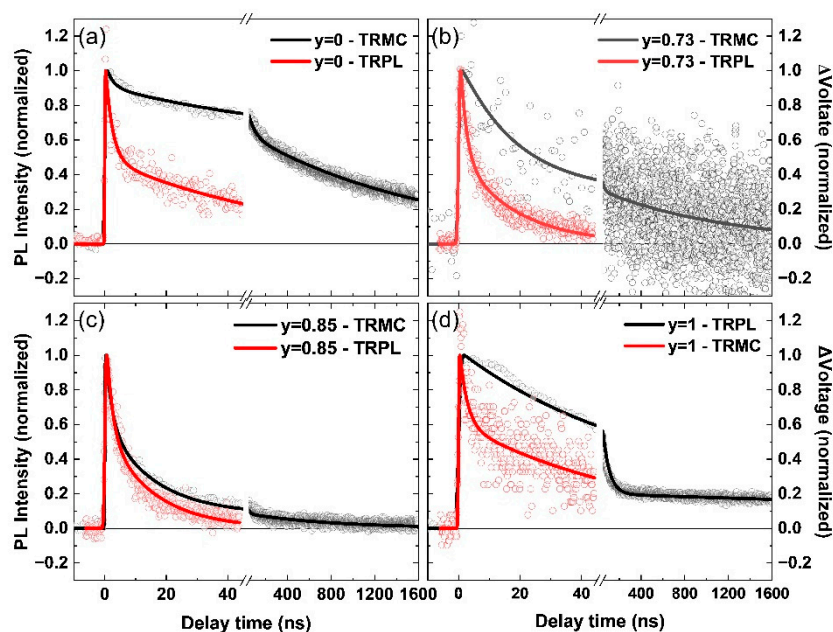

**Figure S3.** Comparison between TRMC and TRPL kinetics of MAPb(Br<sub>1-y</sub>I<sub>y</sub>)<sub>3</sub> single crystals with (a)  $y = 0$ ; (b)  $y = 0.73$ ; (c)  $y = 0.82$ ; (d)  $y = 1$  at room temperature. The solid lines are fitting curves based on multiple-exponential decay functions, and the detailed fitting parameters are shown in Table 2.

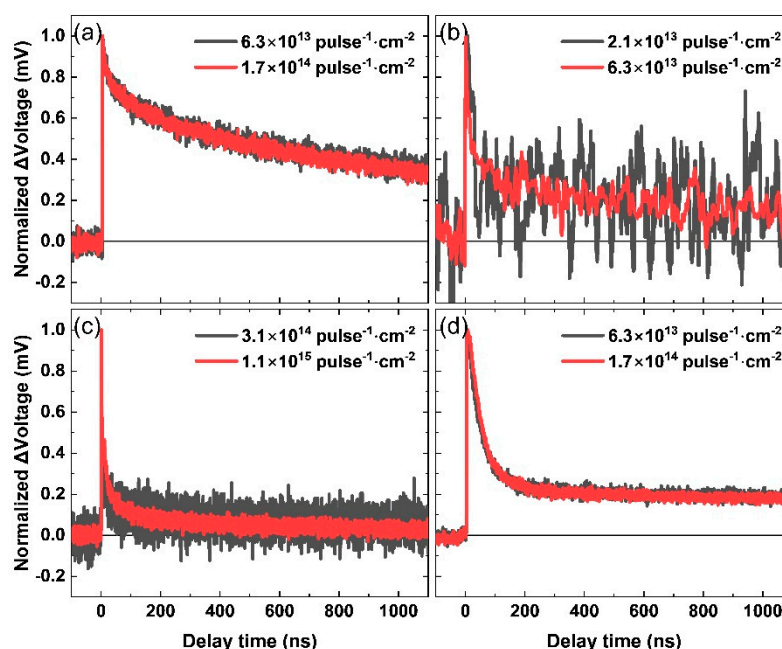

**Figure S4.** TRMC kinetics of MAPb(Br<sub>1-y</sub>I<sub>y</sub>)<sub>3</sub> single crystals with (a)  $y = 0$ ; (b)  $y = 0.73$ ; (c)  $y = 0.82$ ; (d)  $y = 1$  under different excitation fluencies.

**Table S1.** Lattice parameters of MAPb(Br<sub>1-y</sub>I<sub>y</sub>)<sub>3</sub> single crystals with different I compositions.

| $y$ | Crystal phase | Space group  | $a$ [Å] | $b$ [Å] | $c$ [Å] | $V$ [Å <sup>3</sup> ] |
|-----|---------------|--------------|---------|---------|---------|-----------------------|
| 0   | cubic         | $Pm\bar{3}m$ | 5.94    | 5.94    | 5.94    | 209.58                |

---

|             |            |                |      |      |       |         |
|-------------|------------|----------------|------|------|-------|---------|
| <b>0.73</b> | cubic      | <i>P</i> m-3m  | 6.22 | 6.22 | 6.22  | 240.64  |
| <b>0.82</b> | cubic      | <i>P</i> m-3m  | 6.25 | 6.25 | 6.25  | 244.14  |
| <b>1</b>    | tetragonal | <i>I</i> 4/mcm | 8.93 | 8.93 | 12.76 | 1017.54 |

---
