# Supplementary material for: Charge Carrier Recombination Dynamics in MAPb(Br1−yIy)3 Single Crystals
Source: MDPI journal article supplement (doi:10.3390/cryst12101425), 2022-10-09
Supplement: s1 [file s1]

Archive with 1 entries (1 files):
- crystals-1944183-supplementary.pdf
